# Supplementary material for: Distinct role of IL-1β in instigating disease in Sharpincpdm mice
Source: Sci Rep. 2016 Nov 28;6:36634. doi: 10.1038/srep36634 (PMC5125001; doi:10.1038/srep36634)

## SUPPLEMENTARY INFORMATION

### Distinct role of IL-1 $\beta$ in instigating disease in *Sharpin*<sup>cdpm</sup> mice

Prajwal Gurung<sup>1</sup>, Bhesh Raj Sharma<sup>1</sup> and Thirumala-Devi Kanneganti<sup>1,\*</sup>

<sup>1</sup> Department of Immunology, St. Jude Children's Research Hospital, Memphis, TN, 38105, USA.

**\* Correspondence should be addressed to:**

Thirumala-Devi Kanneganti

Department of Immunology, St Jude Children's Research Hospital

MS #351, 570, St. Jude Place, Suite E7004

Memphis TN 38105-2794

Tel: (901) 595-3634; Fax. (901) 595-5766.

E-mail: [Thirumala-Devi.Kanneganti@StJude.org](mailto:Thirumala-Devi.Kanneganti@StJude.org).

**Running Title:** IL-1 $\beta$  provokes skin inflammation.

**Keywords:** SHARPIN, IL-1 $\beta$ , IL-1 $\alpha$ , IL-1R, skin inflammation

## Extended Data Figures

**Extended Data Figure 1. Frequencies of antigen-experienced activated T cells are significantly increased in the spleens of diseased *Sharpin*<sup>cpdm</sup> mice.** Flow cytometry analysis of splenocytes from control and diseased *Sharpin*<sup>cpdm</sup> mice on day 70 to examine the status of activated T cells. **a**, Representative flow plots showing the frequency of CD8<sup>+</sup>CD11a<sup>hi</sup> T cells in the spleen. **b**, Cumulative bar graphs representing frequencies of CD8<sup>+</sup>CD11a<sup>hi</sup> T cells in the spleen. **c**, Representative flow plots showing the frequency of CD4<sup>+</sup>CD44<sup>+</sup>CD11a<sup>hi</sup> T cells in the spleen. **d**, Cumulative bar graphs representing frequencies of CD8<sup>+</sup>CD11a<sup>hi</sup> T cells in the spleen. Data represented as means  $\pm$  s.e.m. Control, n=4; *Sharpin*<sup>cpdm</sup>, n=4 for bar graphs. Statistical significance between groups was determined by Mann-Whitney test and *P* values less than 0.05 were considered statistically significant. \**P*<0.05.

**Extended Data Figure 2. Cellular characterization of control and diseased *Sharpin*<sup>cpdm</sup> in PBL.** Flow cytometry analysis of PBL from control and diseased *Sharpin*<sup>cpdm</sup> mice on day 70. Representative flow plots of CD11b<sup>+</sup>Gr1<sup>+</sup> neutrophils (**a**), CD19<sup>+</sup>MHCII<sup>+</sup> B cells (**c**), CD4<sup>+</sup> and CD8<sup>+</sup> T cells (**e**), CD8<sup>+</sup>CD11a<sup>hi</sup> T cells (**h**), and CD4<sup>+</sup>CD44<sup>+</sup>CD11a<sup>hi</sup> T cells (**j**) in the PBL. Cumulative bar graphs representing frequencies of CD11b<sup>+</sup>Gr1<sup>+</sup> neutrophils (**b**), CD19<sup>+</sup>MHCII<sup>+</sup> B cells (**d**), CD4<sup>+</sup> T cells (**f**), CD8<sup>+</sup> T cells (**g**), CD8<sup>+</sup>CD11a<sup>hi</sup> T cells (**i**), and CD4<sup>+</sup>CD44<sup>+</sup>CD11a<sup>hi</sup> T cells (**k**) in the PBL. Control, n=7; *Sharpin*<sup>cpdm</sup>, n=5 for **b**, **d**, **f**, **g**, **i** and **k**. Bar graphs are presented as means  $\pm$  s.e.m.. Statistical significance was determined by Mann-Whitney test and *P* values less than 0.05 are considered statistically significant. \**P*<0.05, \*\**P*<0.01.

**Extended Data Figure 3. PBL analysis demonstrates cellular dysregulation in pre-diseased *Sharpin*<sup>cpdm</sup> mice.** Flow cytometry analysis of PBL from control and pre-diseased *Sharpin*<sup>cpdm</sup> mice on day 25 to examine immune cell dysregulation. Representative flow plots of CD11b<sup>+</sup>Gr1<sup>+</sup> neutrophils (a), CD19<sup>+</sup>MHCII<sup>+</sup> B cells (c), CD4<sup>+</sup> and CD8<sup>+</sup> T cells (e), CD8<sup>+</sup>CD11a<sup>hi</sup> T cells (h), and CD4<sup>+</sup>CD44<sup>+</sup>CD11a<sup>hi</sup> T cells (j) in the PBL. Cumulative bar graphs representing frequencies of CD11b<sup>+</sup>Gr1<sup>+</sup> neutrophils (b), CD19<sup>+</sup>MHCII<sup>+</sup> B cells (d), CD4<sup>+</sup> T cells (f), CD8<sup>+</sup> T cells (g), CD8<sup>+</sup>CD11a<sup>hi</sup> T cells (i), and CD4<sup>+</sup>CD44<sup>+</sup>CD11a<sup>hi</sup> T cells (k) in the PBL. Control, n=4; *Sharpin*<sup>cpdm</sup>, n=4 for b, d, f, g, i and k. Statistical significance between groups was determined by Mann-Whitney test and *P* values less than 0.05 are considered statistically significant. \**P*<0.05.

**Extended Data Figure 4. Frequencies of antigen-experienced activated T cells are significantly increased in the spleen of pre-diseased *Sharpin*<sup>cpdm</sup> mice.** Flow cytometry analysis of splenocytes from control and pre-diseased *Sharpin*<sup>cpdm</sup> mice on day 25 to examine the status of activated T cells. a, Representative flow plots showing the frequency of CD8<sup>+</sup>CD11a<sup>hi</sup> T cells in the spleen. b, Cumulative bar graphs representing frequencies of CD8<sup>+</sup>CD11a<sup>hi</sup> T cells in the spleen. c, Representative flow plots showing the frequency of CD4<sup>+</sup>CD44<sup>+</sup>CD11a<sup>hi</sup> T cells in the spleen. d, Cumulative bar graphs representing frequencies of CD8<sup>+</sup>CD11a<sup>hi</sup> T cells in the spleen. Control, n=4; *Sharpin*<sup>cpdm</sup>, n=4 for bar graphs. Statistical significance between groups was determined by Mann-Whitney test and *P* values less than 0.05 are considered statistically significant. \**P*<0.05.

**Extended Data Figure 5. *Sharpin*<sup>cpdm</sup> hematopoietic cells are not sufficient to instigate dermatitis in WT recipients.** *Sharpin*<sup>cpdm</sup> >> WT and WT >> WT chimeras were generated by transferring bone marrow cells from *Sharpin*<sup>cpdm</sup> and WT mice into

lethally irradiated WT recipients. *Sharpin*<sup>cpdm</sup> >> WT and WT >> WT chimeras were monitored for signs of dermatitis and disease post chimerism. **a**, Disease free curves for *Sharpin*<sup>cpdm</sup> >> WT and WT >> WT chimeras. **b-l**, PBL from *Sharpin*<sup>cpdm</sup> >> WT and WT >> WT chimeras on day 100 to examine immune cell dysregulation. Representative flow plots of CD4<sup>+</sup> and CD8<sup>+</sup> T cells (**b**), CD4<sup>+</sup>CD44<sup>+</sup>CD11a<sup>hi</sup> T cells (**e**), CD8<sup>+</sup>CD11a<sup>hi</sup> T cells (**g**), CD11b<sup>+</sup>Gr1<sup>+</sup> neutrophils (**i**), and CD19<sup>+</sup>MHCII<sup>+</sup> B cells (**k**) in the PBL. Cumulative bar graphs representing frequencies of CD4<sup>+</sup> T cells (**c**), CD8<sup>+</sup> T cells (**d**), CD4<sup>+</sup>CD44<sup>+</sup>CD11a<sup>hi</sup> T cells (**f**), CD8<sup>+</sup>CD11a<sup>hi</sup> T cells (**h**) CD11b<sup>+</sup>Gr1<sup>+</sup> neutrophils (**j**), and CD19<sup>+</sup>MHCII<sup>+</sup> B cells (**l**) in the PBL. WT >> WT, n=4; *Sharpin*<sup>cpdm</sup> >> WT, n=5 for **c**, **d**, **f**, **h**, **j** and **l**. Statistical significance between groups was determined by Mann-Whitney test and *P* values less than 0.05 are considered statistically significant. \**P*<0.05.

**Extended Data Figure 6. Histological analysis of skin sections from *Sharpin*<sup>cpdm</sup> and *Sharpin*<sup>cpdm</sup> × *Il1a*<sup>-/-</sup> mice.** **a**, Representative hematoxylin and eosin (H&E) images of control, *Sharpin*<sup>cpdm</sup> and *Sharpin*<sup>cpdm</sup> × *Il1a*<sup>-/-</sup> mice. **b**, Epidermal thickness measured from the skin sections of control, *Sharpin*<sup>cpdm</sup> and *Sharpin*<sup>cpdm</sup> × *Il1a*<sup>-/-</sup> mice. The epidermal thickness was measured using FIJI Image J open source software. n=4 for control, n=4 for *Sharpin*<sup>cpdm</sup> and n=4 for *Sharpin*<sup>cpdm</sup> × *Il1a*<sup>-/-</sup> groups. Statistical significance was determined by Mann-Whitney testing, and *P* values less than 0.05 are considered statistically significant. \**P*<0.05.

**Extended Data Figure 7. IL-1α deficiency does not rescue activated T cell phenotype in *Sharpin*<sup>cpdm</sup> mice.** Flow cytometry analysis of splenocytes from control, *Sharpin*<sup>cpdm</sup> and *Sharpin*<sup>cpdm</sup> × *Il1a*<sup>-/-</sup> mice on day 45 to examine the status of activated T cells. **a**, Representative flow plots showing the frequency of CD4<sup>+</sup>CD44<sup>+</sup>CD11a<sup>hi</sup> T cells in the spleen. **b**, Cumulative bar graphs representing frequencies of CD4<sup>+</sup>CD44<sup>+</sup>CD11a<sup>hi</sup>

T cells in the spleen. **c**, Representative flow plots showing the frequency of CD8<sup>+</sup>CD11a<sup>hi</sup> T cells in the spleen. **d**, Cumulative bar graphs representing frequencies of CD8<sup>+</sup>CD11a<sup>hi</sup> T cells in the spleen. Control, n=6; *Sharpin*<sup>cpdm</sup>, n=6; *Sharpin*<sup>cpdm</sup> × *Il1a*<sup>-/-</sup>, n=4 for bar graphs. Statistical significance was determined by one-way ANOVA, Dunnett's multiple comparisons test and *P* values less than 0.05 are considered statistically significant. \*\**P*<0.01.

**Extended Data Figure 8. PBL analysis of *Sharpin*<sup>cpdm</sup> and *Sharpin*<sup>cpdm</sup> × *Il1a*<sup>-/-</sup> mice.**

Flow cytometry analysis of PBL from control, *Sharpin*<sup>cpdm</sup> and *Sharpin*<sup>cpdm</sup> × *Il1a*<sup>-/-</sup> mice on day 45 to examine immune cell dysregulation. Representative flow plots of CD11b<sup>+</sup>Gr1<sup>+</sup> neutrophils (**a**), CD4<sup>+</sup> and CD8<sup>+</sup> T cells (**c**), CD4<sup>+</sup>CD11a<sup>hi</sup> T cells (**f**), and CD8<sup>+</sup>CD11a<sup>hi</sup> T cells (**h**) in the PBL. Cumulative bar graphs representing frequencies of CD11b<sup>+</sup>Gr1<sup>+</sup> neutrophils (**b**), CD4<sup>+</sup> T cells (**d**), CD8<sup>+</sup> T cells (**e**), CD8<sup>+</sup>CD11a<sup>hi</sup> T cells (**g**), and CD4<sup>+</sup>CD44<sup>+</sup>CD11a<sup>hi</sup> T cells (**i**) in the PBL. Control, n=11; *Sharpin*<sup>cpdm</sup>, n=4; *Sharpin*<sup>cpdm</sup> × *Il1a*<sup>-/-</sup>, n=4 for **b**, **d**, **e**, **g**, and **i**. Bar graphs are presented as means ± s.e.m. Statistical significance between groups was determined by one-way ANOVA, Dunnett's multiple comparisons test and *P* values less than 0.05 are considered statistically significant. \*\*\*\**P*<0.0001.

**Extended Data Figure 9. Histological analysis of skin sections from *Sharpin*<sup>cpdm</sup>**

**and *Sharpin*<sup>cpdm</sup> × *Il1b*<sup>-/-</sup> mice.** **a**, Representative hematoxylin and eosin (H&E) images of control, *Sharpin*<sup>cpdm</sup> and *Sharpin*<sup>cpdm</sup> × *Il1b*<sup>-/-</sup> mice. **b**, Epidermal thickness of skin sections from control, *Sharpin*<sup>cpdm</sup> and *Sharpin*<sup>cpdm</sup> × *Il1b*<sup>-/-</sup> mice. The epidermis of the H&E sections were measured using FIJI Image J open source software. n=4 for control, n=4 for *Sharpin*<sup>cpdm</sup> and n=4 for *Sharpin*<sup>cpdm</sup> × *Il1b*<sup>-/-</sup> groups. Data represented as means

± s.e.m. Statistical significance was determined by Mann-Whitney testing, and *P* values less than 0.05 are considered statistically significant. \**P*<0.05, ns=not significant.

**Extended Data Figure 10. PBL analysis of *Sharpin*<sup>cpdm</sup> and *Sharpin*<sup>cpdm</sup> × *Il1b*<sup>-/-</sup> mice.** Flow cytometry analysis of PBL from control, *Sharpin*<sup>cpdm</sup> and *Sharpin*<sup>cpdm</sup> × *Il1b*<sup>-/-</sup> mice to examine immune cell dysregulation. Representative flow plots of CD11b<sup>+</sup>Gr1<sup>+</sup> neutrophils (a), CD4<sup>+</sup> and CD8<sup>+</sup> T cells (c), CD4<sup>+</sup> CD44<sup>+</sup>CD11a<sup>hi</sup> T cells (f), and CD8<sup>+</sup>CD11a<sup>hi</sup> T cells (h) in the PBL. Cumulative bar graphs representing frequencies of CD11b<sup>+</sup>Gr1<sup>+</sup> neutrophils (b), CD4<sup>+</sup> T cells (d), CD8<sup>+</sup> T cells (e), CD4<sup>+</sup>CD44<sup>+</sup>CD11a<sup>hi</sup> T cells (g), and CD8<sup>+</sup>CD11a<sup>hi</sup> T cells (i) in the PBL. Control, n=11; *Sharpin*<sup>cpdm</sup>, n=9; *Sharpin*<sup>cpdm</sup> × *Il1b*<sup>-/-</sup>, n=7 for b, d, e, g, and i. Bar graphs are presented as means ± s.e.m. Statistical significance between groups was determined by one-way ANOVA, Dunnett's multiple comparisons test and *P* values less than 0.05 are considered statistically significant. \**P*<0.05, \*\**P*<0.01, \*\*\**P*<0.001, \*\*\*\**P*<0.0001.

**Extended Data Figure 11. IL-1β deficiency does not rescue activated T cell phenotype in *Sharpin*<sup>cpdm</sup> mice.** Flow cytometry analysis of splenocytes from control, *Sharpin*<sup>cpdm</sup> and *Sharpin*<sup>cpdm</sup> × *Il1b*<sup>-/-</sup> mice to examine the status of activated T cells. a, Representative flow plots showing the frequency of CD4<sup>+</sup>CD44<sup>+</sup>CD11a<sup>hi</sup> T cells in the spleen. b, Cumulative bar graphs representing frequencies of CD4<sup>+</sup>CD44<sup>+</sup>CD11a<sup>hi</sup> T in the spleen. c, Representative flow plots showing the frequency of CD8<sup>+</sup>CD11a<sup>hi</sup> T cells in the spleen. d, Cumulative bar graphs representing frequencies of CD8<sup>+</sup>CD11a<sup>hi</sup> T in the spleen. Control, n=13; *Sharpin*<sup>cpdm</sup>, n=11; *Sharpin*<sup>cpdm</sup> × *Il1b*<sup>-/-</sup>, n=10 for bar graphs. Statistical significance between groups was determined by one-way ANOVA, Dunnett's multiple comparisons test and *P* values less than 0.05 are considered statistically significant. \**P*<0.05, \*\**P*<0.01, \*\*\**P*<0.001.

Extended Data Figure 1

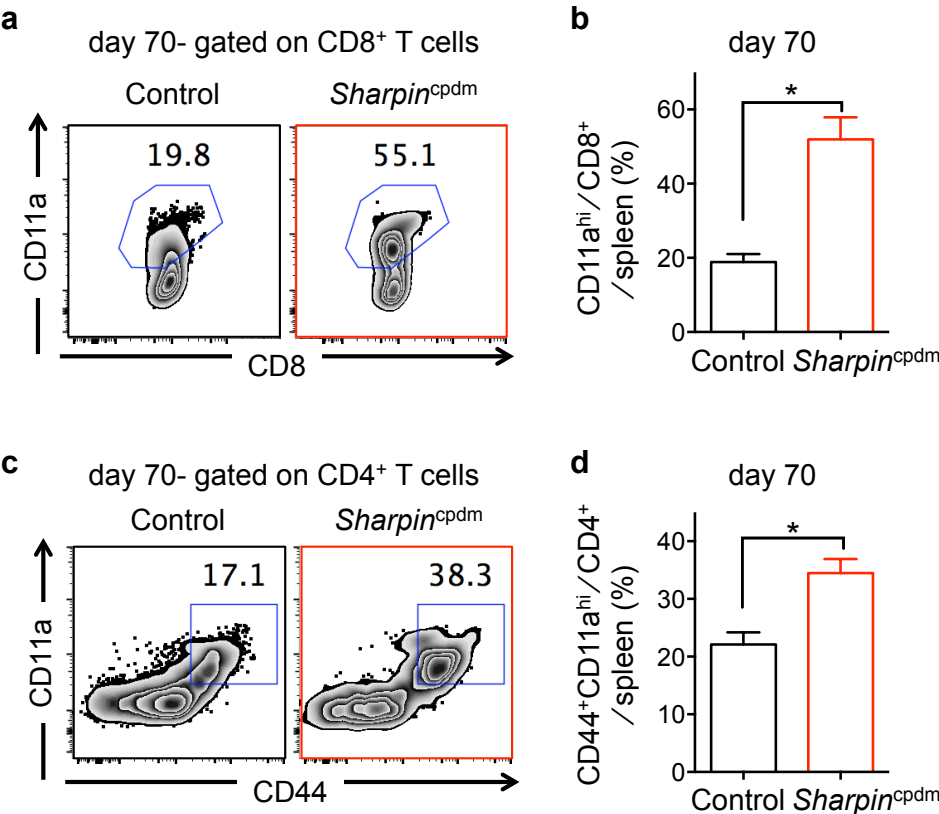

## Extended Data Figure 2

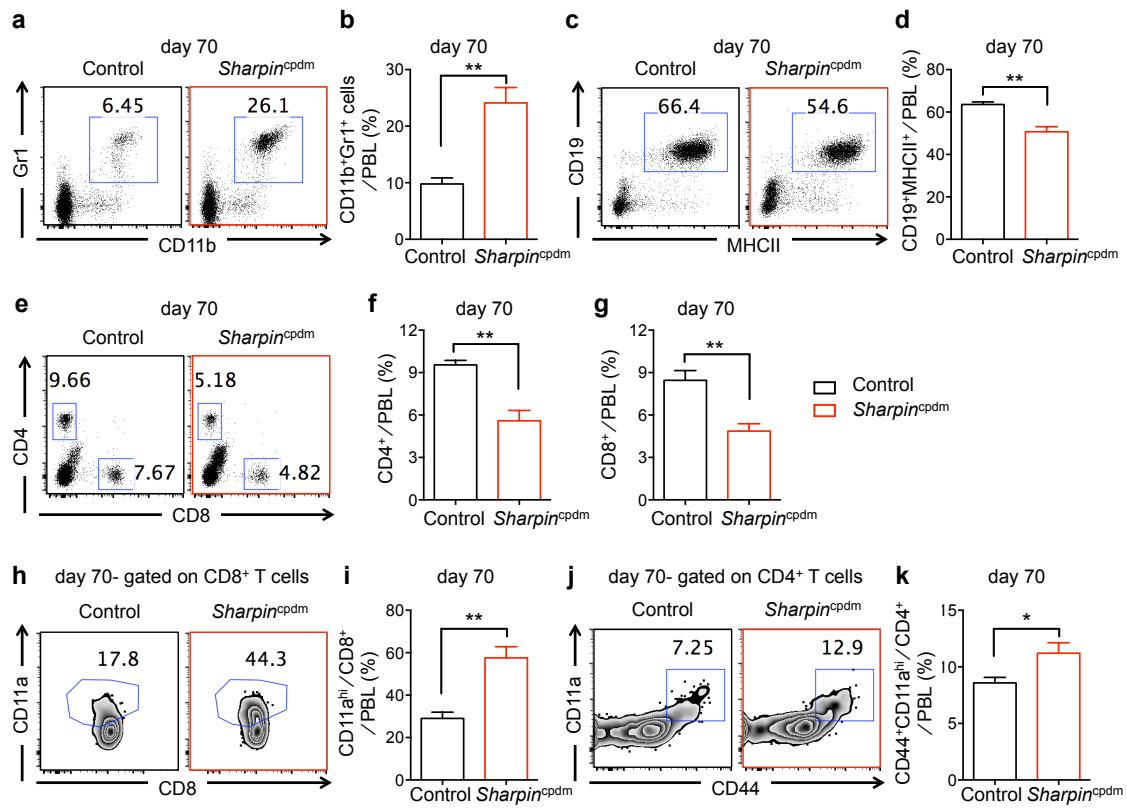

### Extended Data Figure 3

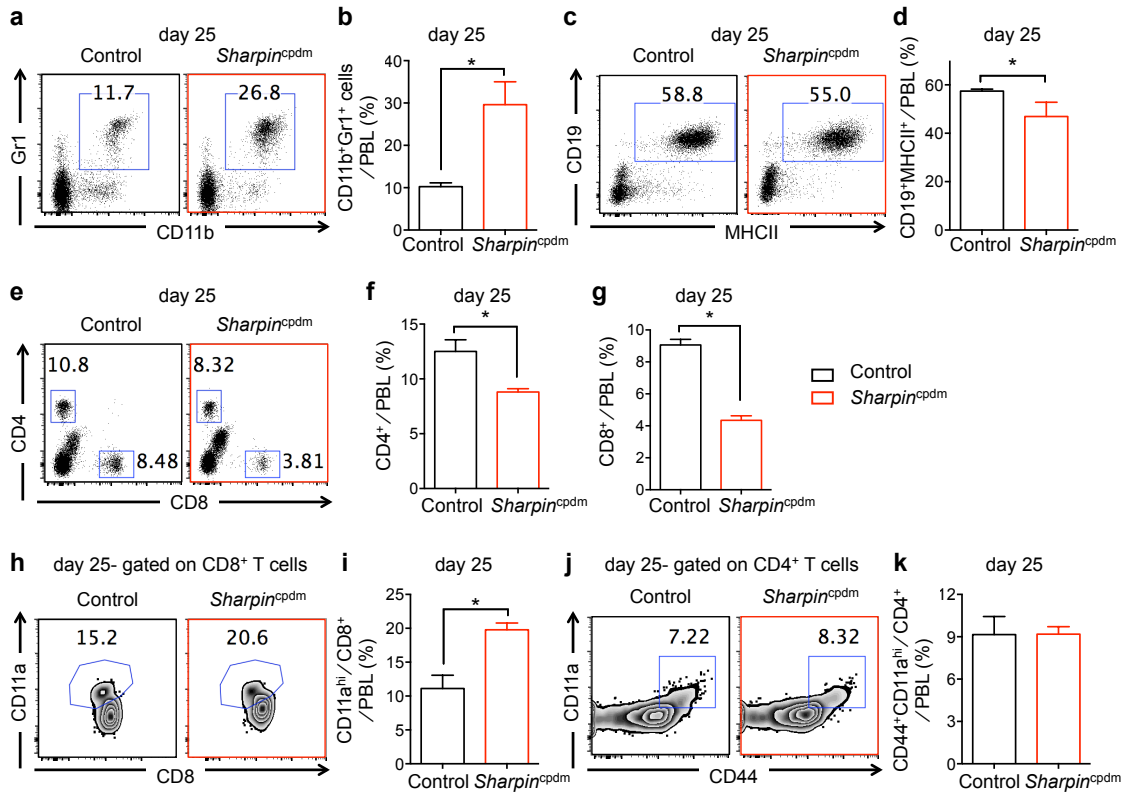

Extended Data Figure 4

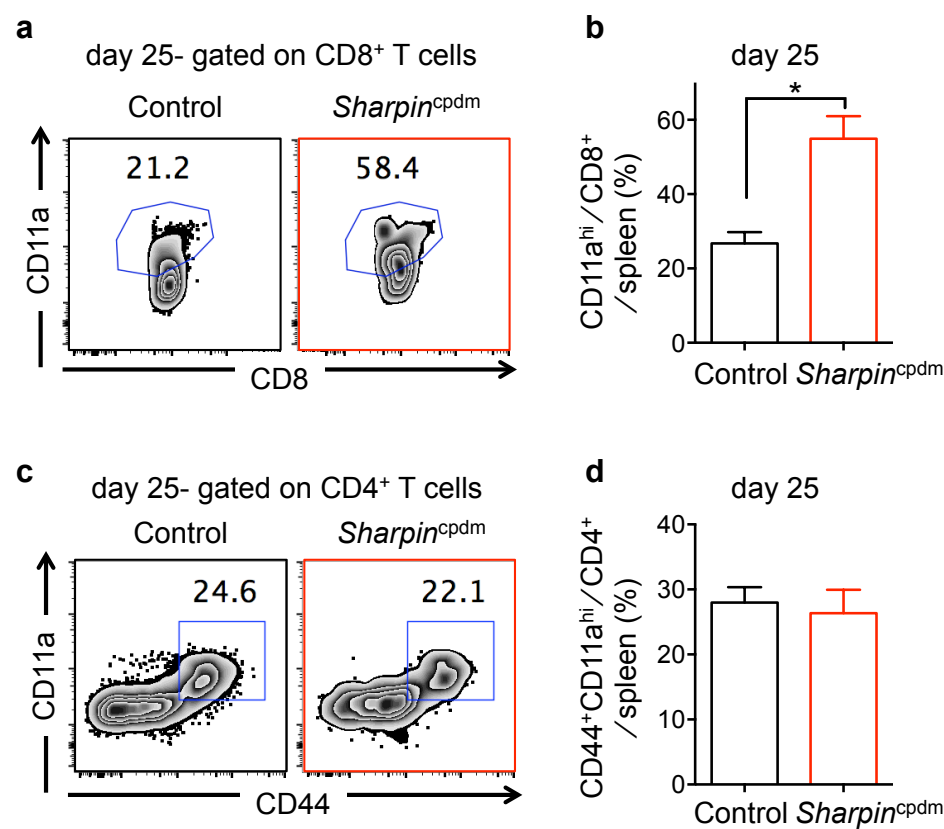

## Extended Data Figure 5

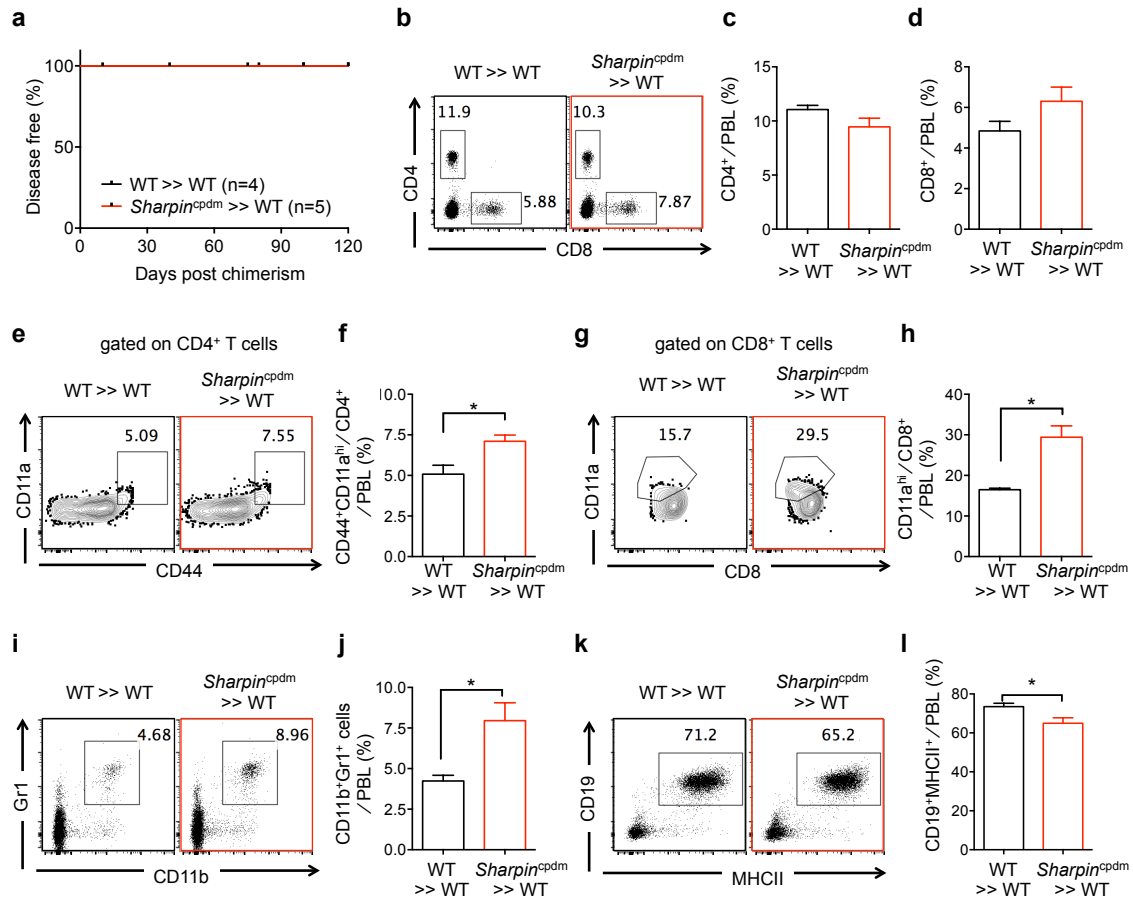

## Extended Data Figure 6

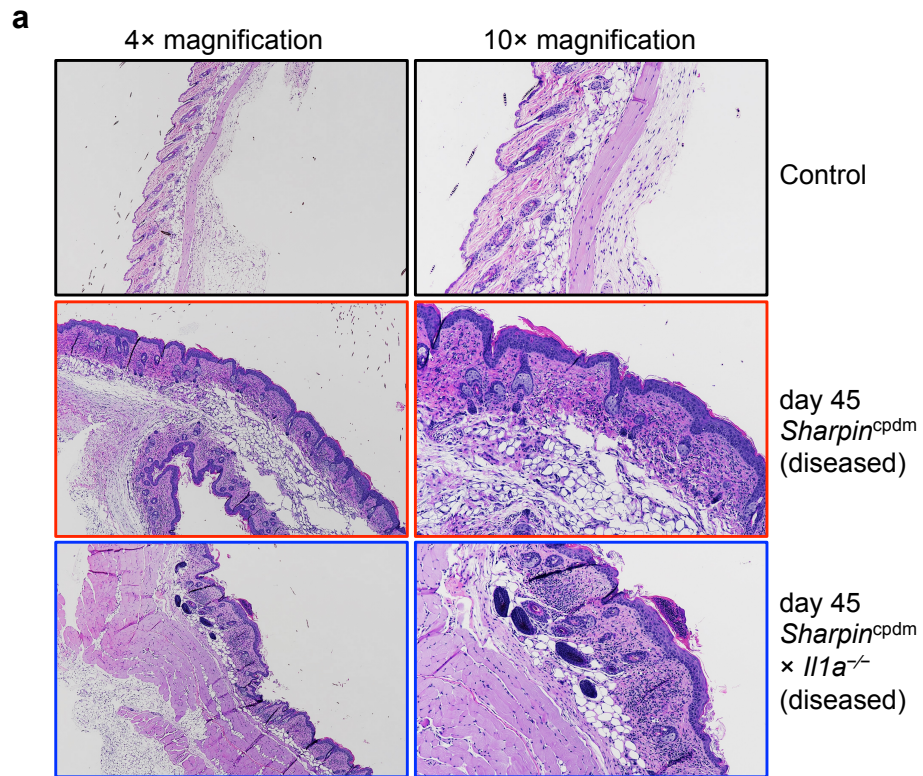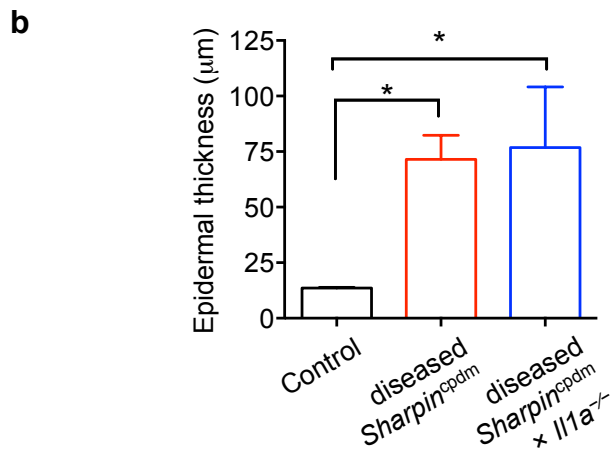

## Extended Data Figure 7

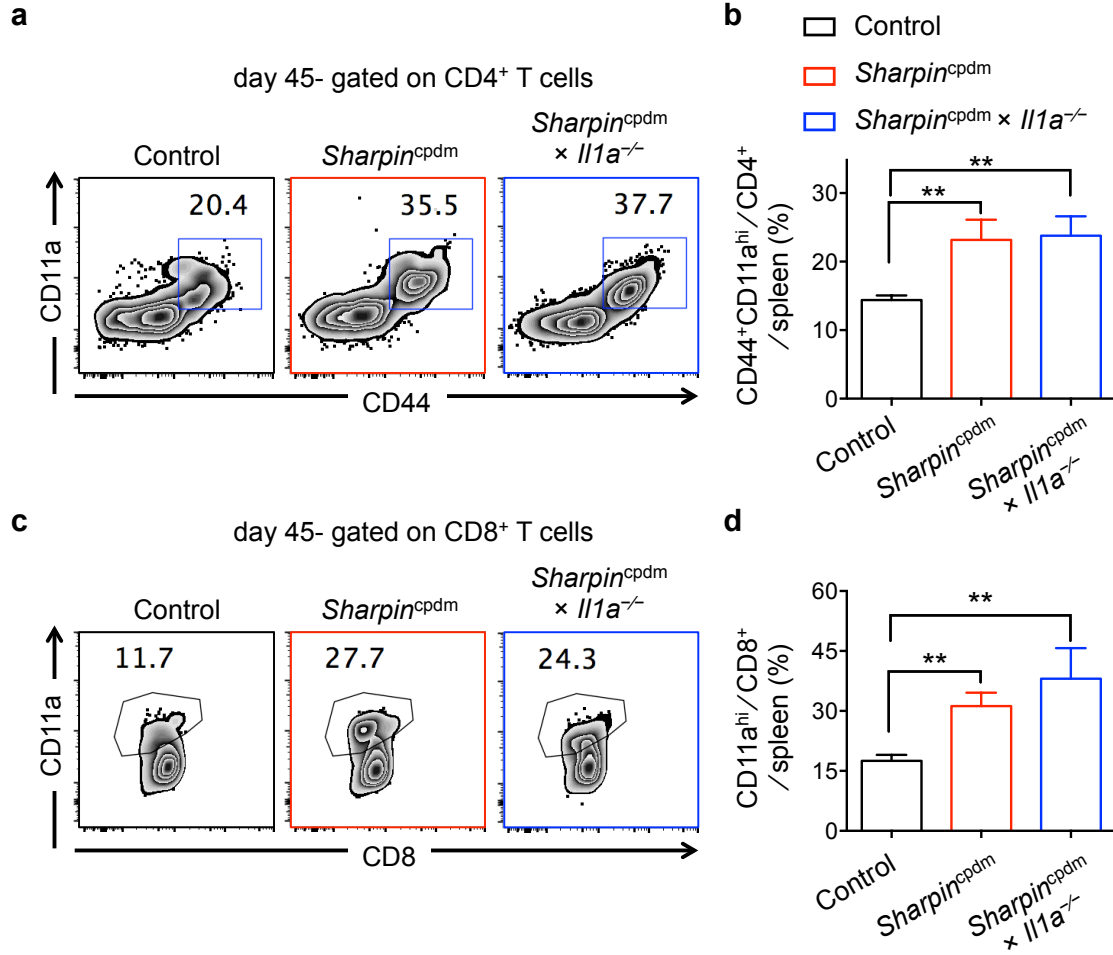

## Extended Data Figure 8

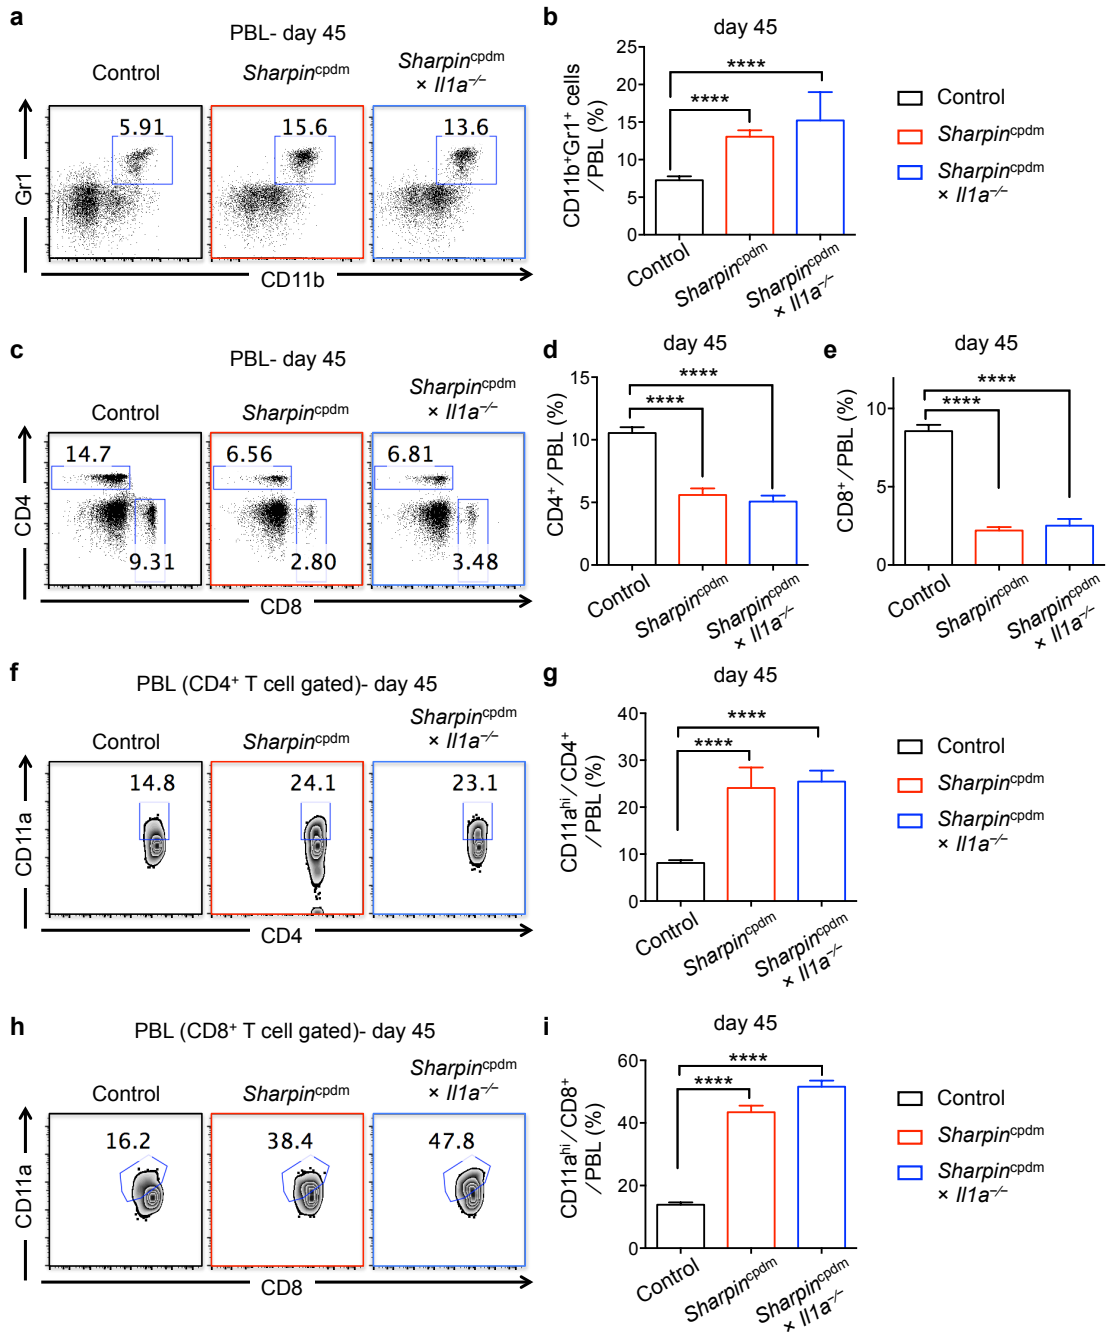

## Extended Data Figure 9

**a**

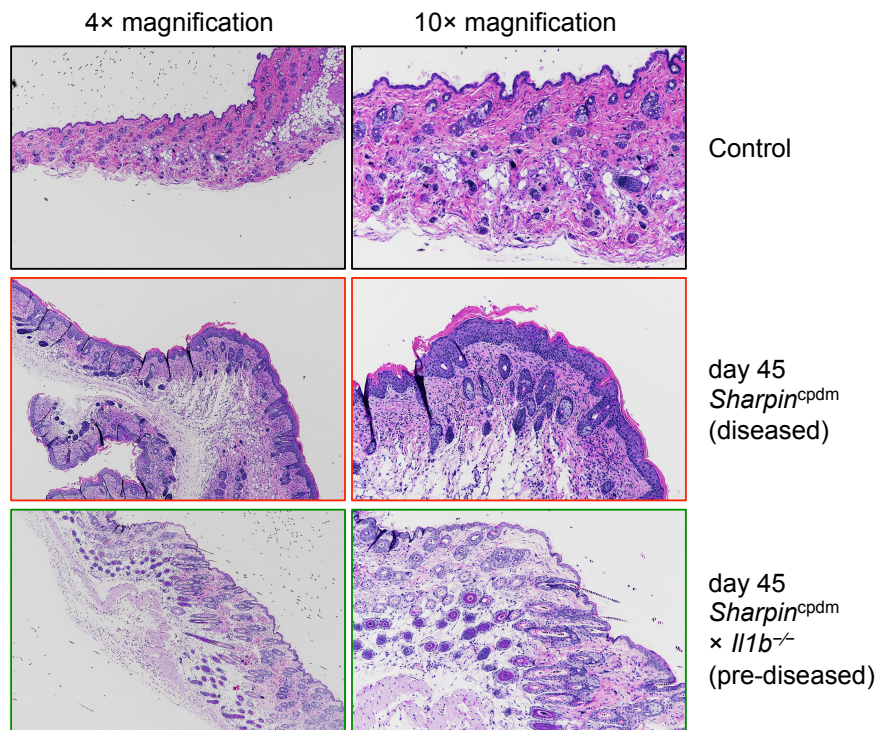

**b**

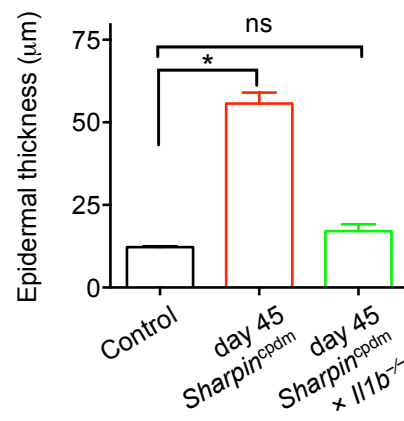

## Extended Data Figure 10

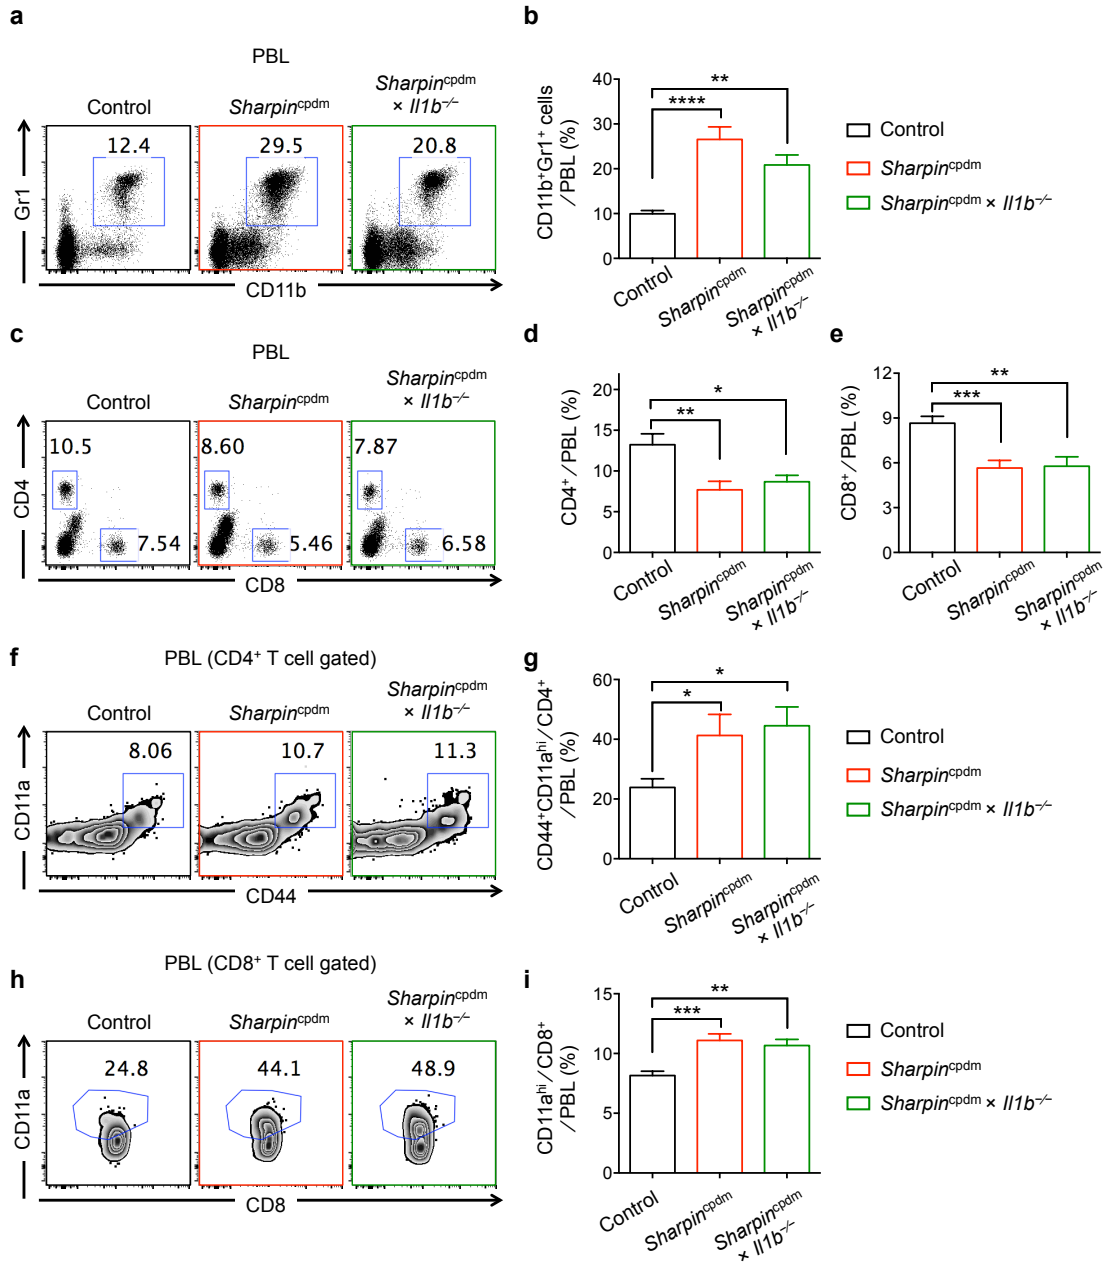

Extended Data Figure 11

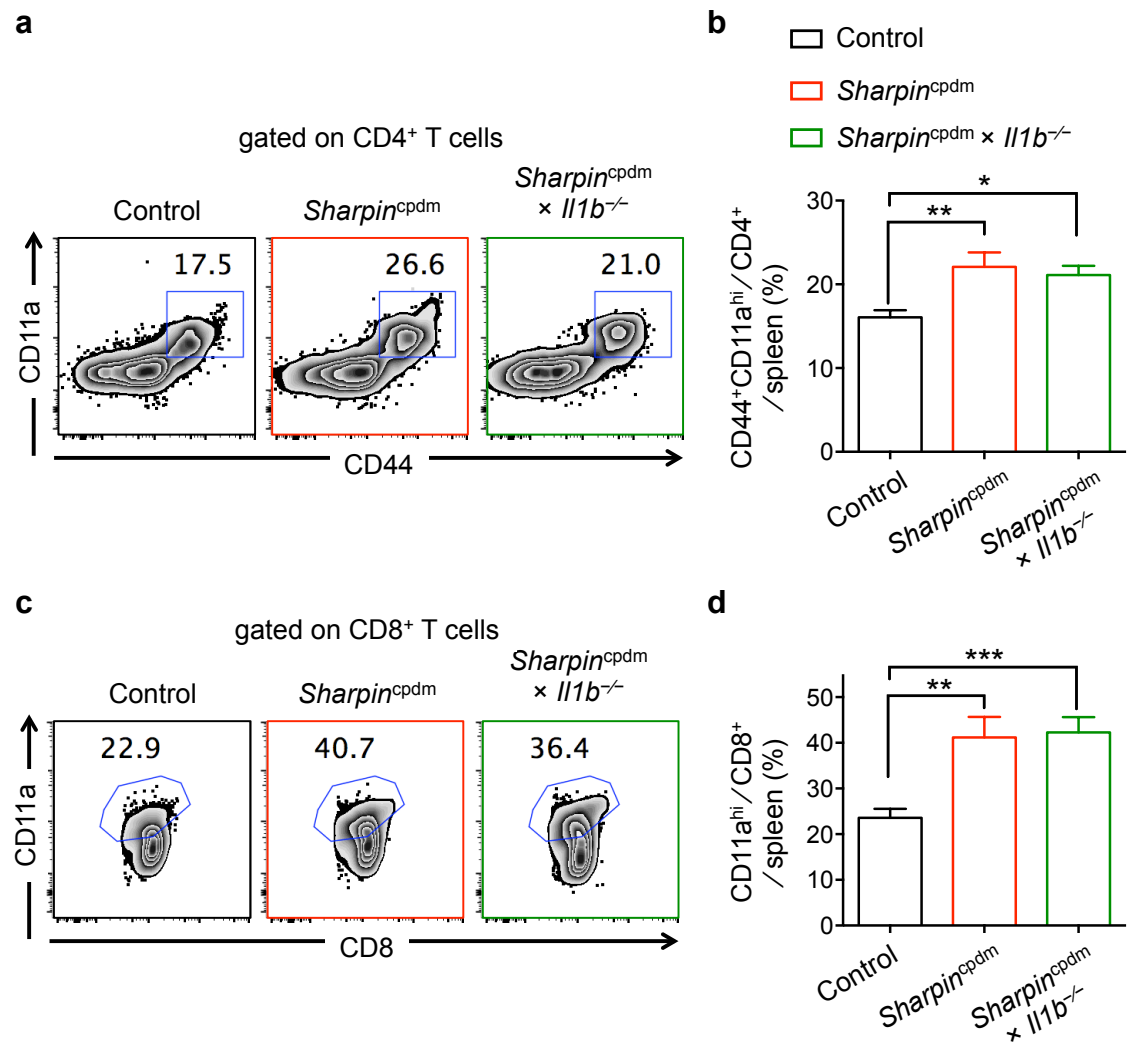

Supplement: Supplementary Information [file srep36634-s1.pdf]
